# Supplementary material for: Variable Rates of Simple Satellite Gains across the Drosophila Phylogeny
Source: Oxford University Press journal article supplement (doi:10.1093/molbev/msy005), 2018-01-16
Supplement: msy005_supp.pdf [file msy005_supp.pdf]

Supplementary Table 1. Sequencing and mapping statistics

| Species                 | Flybase genome release | Sex | Reads    | Auto. Depth | X Depth |
|-------------------------|------------------------|-----|----------|-------------|---------|
| <i>D. simulans</i>      | r2.02                  | F   | 29287069 | 21.21       | 21.71   |
|                         |                        | M   | 25243382 | 19.19       | 10.21   |
| <i>D. sechelia</i>      | r1.3                   | F   | 26030971 | 18.26       | 17.13   |
|                         |                        | M   | 22024423 | 14.64       | 7.43    |
| <i>D. melanogaster</i>  | r6.03                  | F   | 18811547 | 14.01       | 14.20   |
|                         |                        | M   | 18552576 | 14.85       | 8.17    |
| <i>D. erecta</i>        | r1.3                   | F   | 20460077 | 16.56       | 16.57   |
|                         |                        | M   | 23801524 | 19.48       | 9.84    |
| <i>D. ananassae</i>     | r1.3                   | F   | 15862939 | 8.73        | 8.31    |
|                         |                        | M   | 20852751 | 12.48       | 6.47    |
| <i>D. pseudoobscura</i> | r3.2                   | F   | 21585986 | 11.54       | 11.54   |
|                         |                        | M   | 18561056 | 11.30       | 5.94    |
| <i>D. persimilis</i>    | r1.3                   | F   | 17295743 | 10.38       | 9.38    |
|                         |                        | M   | 17555204 | 12.22       | 6.85    |
| <i>D. mojavensis</i>    | r1.3                   | F   | 17806801 | 11.50       | 10.81   |
|                         |                        | M   | 18100159 | 12.22       | 5.99    |
| <i>D. virilis</i>       | r1.2                   | F   | 20734250 | 11.73       | 10.27   |
|                         |                        | M   | 16986520 | 10.09       | 4.57    |

Supplementary Table 2. Satellites on the Y-chromosome

| Species                 | Y-linked kmers*                                                                                                                                                                                                                                                                                                                                                                                                                          | Y-specific kmers**                                                                                                                                                                                                                                                                                                                                              | No. of (%)    |               |
|-------------------------|------------------------------------------------------------------------------------------------------------------------------------------------------------------------------------------------------------------------------------------------------------------------------------------------------------------------------------------------------------------------------------------------------------------------------------------|-----------------------------------------------------------------------------------------------------------------------------------------------------------------------------------------------------------------------------------------------------------------------------------------------------------------------------------------------------------------|---------------|---------------|
|                         |                                                                                                                                                                                                                                                                                                                                                                                                                                          |                                                                                                                                                                                                                                                                                                                                                                 | Y-linked †    | Y-specific ‡  |
| <i>D. melanogaster</i>  | AATAT, AAGAC, AATATAT, AAGAGG, AATAC, AAAGAC, AATAGAC, AAGACATGAC, AATAG, AGATG, AAAAC, AAGACTAGAC, AAACAAT, AAAACAT, AAAGAG, AAAATAGAC, AAAAGAG, AAATTACT, AAAACATAT, ACATG, AAAAGAC, AAAAAC, AAGACAAGGAC, AAGACAAGACAC, AAT, AACAGAACATGTTTCG, AAATAT, AACAG, AACTTAAT                                                                                                                                                                 | AAAAAC, AAAAC, AAAACAT, AAAACATAT, AAAAGAC, AAAATAGAC, AAACAAT, AAAGAC, AAT, AATTACT, AACAG, AACAGAACATGTTTCG, AACTTAAT, AAGACAAGACAC, AAGACAAGGAC, AAGACATGAC, AAGACTAGAC, AATAC, AATAGAC, ACATG                                                                                                                                                               | 29<br>(34.9%) | 20<br>(69.0%) |
| <i>D. simulans</i>      | AATAT, AAACAAC, AAGAGAATAG, AAT, AATATAT, AACCAATC, AGATATAT, AATAGT, AAGAGAAGAGAG, AAACAAT, AATAGAATGG, AAACAAC, AAGAGAG, AAGAGAAGTG, AATAGAATCG, AAATAAC, AATGG, AG, AGATG, AATGT, AAAAGAG, AACCAATT, AACTTAAT                                                                                                                                                                                                                         | AAAACAAC, AAAAGAG, AAACAAT, AAATAAC, AACCAATC, AACCAATT, AACTTAAT, AAGAGAAGAGAG, AAGAGAAGTG, AAGAGAG, AATAGAATGG, AATAGT, AATGG, AATGT, AGATG                                                                                                                                                                                                                   | 23<br>(45.1%) | 15<br>(65.2%) |
| <i>D. sechelia</i>      | AATAT, AAT, AATAATAT, AAAAC, AAATGT, AGATATAT, AATATAT, AAACATGTTCTGTTC, AAAAT, AACCAATT, AACTTAAT, AATATAATATAT, AACAGAACATGATCG, AATGT, AACATAGAAT, ACGAG, AACTTAC, AATAC, AAGAC, AACAC, AAGAT                                                                                                                                                                                                                                         | AAAAC, AAAAT, AAATGT, AACCAATT, AACAC, AACAGAACATGATCG, AAGAC, AAGAT, AATAATAT, AATATAATATAT, AATGT, ACGAG                                                                                                                                                                                                                                                      | 21<br>(35.0%) | 12<br>(57.1%) |
| <i>D. erecta</i>        | AAATAT, AACTTAC, AACATAGAAT, AATAT, AAGAG, AAGAC                                                                                                                                                                                                                                                                                                                                                                                         | AAGAC                                                                                                                                                                                                                                                                                                                                                           | 6<br>(23.1%)  | 1<br>(16.7%)  |
| <i>D. ananasae</i>      | AAAGGT, AACATACAT, AAGACAGAC, AACATAGAAT, ACTGAG, AAGAG, AAGAC                                                                                                                                                                                                                                                                                                                                                                           | AACATAGAAT, AAGAC, AAGACAGAC, AAGAG                                                                                                                                                                                                                                                                                                                             | 7<br>(18.4%)  | 4<br>(57.1%)  |
| <i>D. persimilis</i>    | AAATAC                                                                                                                                                                                                                                                                                                                                                                                                                                   |                                                                                                                                                                                                                                                                                                                                                                 | 1<br>(5.9%)   | 0<br>(0%)     |
| <i>D. pseudoobscura</i> | ACGG                                                                                                                                                                                                                                                                                                                                                                                                                                     |                                                                                                                                                                                                                                                                                                                                                                 | 1<br>(5.3%)   | 0<br>(0%)     |
| <i>D. mojavensis</i>    | AAAAT, AAAAC, ACTGATAT, AAATG, AAGAG, AACATAGAAT, AAGAC                                                                                                                                                                                                                                                                                                                                                                                  | AAAAC, AAATG, AACATAGAAT, AAGAC                                                                                                                                                                                                                                                                                                                                 | 7<br>(10.3%)  | 4<br>(57.1%)  |
| <i>D. virilis</i>       | ACAG, AACTTAT, AC, AAAC, AACTATT, ACACAT, AACCAATCC, AATAATAG, AAATCAAC, AATAGATT, ACAGACAGACCAG, ACAGACAGG, AAGACAGAC, AAATCAACAATCCAAC, AATCAATT, ACAGACAGGCCAG, ACACACAT, AAACATG, ACAGGCAG, ACAGACCAG, AATCTAT, AAACAAGC, ACAGACAGACAGG, AACACAGACAGACAGAC, ACAGACAGACAGAGAG, AAAACAAC, ACAGACAGAGAG, AAACAC, AACTACT, AAATCAT, AAAAC, AACACAGAC, ACACACAG, AACACAGACAGAC, ACTC, AAACCAT, AACAGAACATGTTTCG, ACTAGAG, ACAGAGAG, AAAAC | AAAAC, AAAACAAC, AAAAC, AAAC, AAACAAGC, AAACAC, AAACAGAC, AAACCAT, AAATCAAC, AAATCAACAATCCAAC, AAATCAT, AACCAATCC, AACACAGACAGAC, AACACAGACAGACAGAC, AACTATT, AAGACAGAC, AATAATAG, AATAGATT, AATCAATT, AATCTAT, ACACACAG, ACACACAT, ACAGACAGACAGAGAG, ACAGACAGACAGG, ACAGACAGACCAG, ACAGACAGAGAG, ACAGACAGG, ACAGACAGGCCAG, ACAGACCAG, ACAGAGAG, ACAGGCAG, ACTC | 40<br>(44.4%) | 32<br>(80.0%) |

\*listed in decreasing order of abundance

\*\* Y-specific kmers are a subset of Y-linked kmers

† % represents the fraction of total number of kmers

‡ % represents the fraction of Y-linked kmers

Supplementary table 3. Parallel gains and ambiguous simple satellites

| Parallel gains |                                | Ambiguous    |                                | both   |                           |
|----------------|--------------------------------|--------------|--------------------------------|--------|---------------------------|
| kmer           | species                        | kmer         | species                        | kmer   | species                   |
| AAAAAC         | <i>mel, vir</i>                | AAATTAT      | <i>mel, ere</i>                | AAAAC  | <i>mel, sec, moj</i>      |
| AAACAC         | <i>mel, vir</i>                | AACAC        | <i>mel, sec</i>                | AAAAG  | <i>mel, sec, moj</i>      |
| ACAGACCAG      | <i>mel, vir</i>                | AACAGAG      | <i>mel, sec</i>                | AGATG  | <i>mel, sim, moj</i>      |
| AAAAT          | <i>sec, moj</i>                | AAGAGAAGAGAG | <i>mel, sim</i>                | AATACT | <i>mel, sec, moj, vir</i> |
| AAATGT         | <i>sec, moj</i>                | AAGAGAG      | <i>mel, sim</i>                |        |                           |
| AAACAAC        | <i>sim, vir</i>                | AATAC        | <i>mel, sec</i>                |        |                           |
| AAAGAC         | <i>mel, moj</i>                | AATGT        | <i>mel, sec</i>                |        |                           |
| AAAGAG         | <i>mel, moj</i>                | ACGAG        | <i>mel, sec</i>                |        |                           |
| AAGAGG         | <i>mel, moj</i>                | AAACAAT      | <i>mel, sim, ana</i>           |        |                           |
| AAGGAG         | <i>mel, moj</i>                | AAATAAT      | <i>mel, ana, moj</i>           |        |                           |
| ACTG           | <i>sec, vir</i>                | AAGAC        | <i>mel, sec, ana</i>           |        |                           |
| AACTATT        | <i>ana, vir</i>                | AAAT         | <i>mel, pse, moj, vir</i>      |        |                           |
| AAGACAGAC      | <i>ana, vir</i>                | AAATAT       | <i>mel, ere, moj, vir</i>      |        |                           |
| ACAGACAGACAGG  | <i>ana, vir</i>                | ACAGACGG     | <i>ana, per, pse, moj</i>      |        |                           |
| ACAGACAGG      | <i>ana, vir</i>                | ACAT         | <i>ere, per, moj, vir</i>      |        |                           |
| ACAGAGAG       | <i>ana, vir</i>                | AGATAT       | <i>mel, ana, per, moj, vir</i> |        |                           |
| ACAGAG         | <i>ana, moj</i>                |              |                                |        |                           |
| ACTGAG         | <i>ana, moj</i>                |              |                                |        |                           |
| AAATAC         | <i>sec, per, pse</i>           |              |                                |        |                           |
| AAGTAT         | <i>ana, moj, vir</i>           |              |                                |        |                           |
| ACTCTCT        | <i>ana, moj, vir</i>           |              |                                |        |                           |
| ACTCTAT        | <i>ana, moj, vir</i>           |              |                                |        |                           |
| AAAATAT        | <i>mel, sim, sec, moj</i>      |              |                                |        |                           |
| AGATATAT       | <i>sim, sec, moj, vir</i>      |              |                                |        |                           |
| AATAG          | <i>mel, sim, sec, ere, vir</i> |              |                                |        |                           |
| AATAGT         | <i>sim, ere, vir</i>           |              |                                |        |                           |
| AACATAT        | <i>mel, moj, vir</i>           |              |                                |        |                           |

Supplementary Table 4. Satellites presence and abundance across species

| Simple satellites    | No. of species present | Species names | <i>mel</i> | <i>sim</i> | <i>sec</i> | <i>ere</i> | <i>ana</i> | <i>pse</i> | <i>per</i> | <i>moj</i> | <i>vir</i> |
|----------------------|------------------------|---------------|------------|------------|------------|------------|------------|------------|------------|------------|------------|
| AAAGGT               | 1                      | <i>ana</i>    | 2.6        | 0.0        | 0.0        | 0.0        | 1.3        | 16465.2    | 2.9        | 0.0        | 0.0        |
| AAAGGTC              | 1                      | <i>ana</i>    | 0.0        | 1.5        | 0.0        | 0.0        | 0.0        | 24503.0    | 2.4        | 0.0        | 0.0        |
| AAATGCTGTGCGGT       | 1                      | <i>ana</i>    | 0.0        | 0.0        | 0.0        | 0.0        | 1.7        | 2827.1     | 2.4        | 0.0        | 0.0        |
| AACATACAT            | 1                      | <i>ana</i>    | 0.0        | 0.0        | 0.0        | 0.0        | 0.0        | 1488.7     | 0.0        | 0.0        | 0.0        |
| AAGGTC               | 1                      | <i>ana</i>    | 69.1       | 38.7       | 9.9        | 32.5       | 262747.0   | 36.3       | 12.9       | 40.6       | 31.5       |
| ACAGACAGAG           | 1                      | <i>ana</i>    | 2.9        | 0.0        | 3.0        | 4.9        | 29845.8    | 0.0        | 0.0        | 0.0        | 17.2       |
| ACAGACATG            | 1                      | <i>ana</i>    | 0.0        | 0.0        | 0.0        | 0.0        | 2282.9     | 0.0        | 0.0        | 0.0        | 0.0        |
| AAGAGT               | 1                      | <i>ere</i>    | 0.0        | 0.0        | 0.0        | 8454.0     | 28.1       | 0.0        | 0.0        | 14.3       | 60.3       |
| AAGT                 | 1                      | <i>ere</i>    | 6.0        | 0.0        | 0.0        | 33417.9    | 28.2       | 9.8        | 0.0        | 4.0        | 0.0        |
| AAAACAT              | 1                      | <i>mel</i>    | 4966.1     | 0.0        | 2.0        | 17.1       | 0.0        | 0.0        | 0.0        | 10.1       | 4.4        |
| AAAACATAT            | 1                      | <i>mel</i>    | 3260.2     | 0.0        | 0.0        | 20.4       | 20.6       | 0.0        | 0.0        | 0.0        | 0.0        |
| AAAAGAC              | 1                      | <i>mel</i>    | 2136.7     | 1.5        | 0.0        | 0.0        | 5.2        | 0.0        | 0.0        | 9.3        | 6.3        |
| AAAAGAG              | 1                      | <i>mel</i>    | 6334.8     | 128.0      | 7.4        | 5.1        | 3.7        | 0.0        | 0.0        | 2.4        | 0.0        |
| AAAAGAGAAG           | 1                      | <i>mel</i>    | 5928.6     | 2.9        | 3.5        | 1.8        | 0.0        | 0.0        | 4.8        | 0.0        | 0.0        |
| AAAAGAGAAGAG         | 1                      | <i>mel</i>    | 1164.4     | 0.0        | 0.0        | 0.0        | 0.0        | 0.0        | 0.0        | 0.0        | 0.0        |
| AAAAGG               | 1                      | <i>mel</i>    | 7181.9     | 0.0        | 1.8        | 0.0        | 9.5        | 4.0        | 3.8        | 0.0        | 10.8       |
| AAAAGGAAAAGGAG       | 1                      | <i>mel</i>    | 2007.7     | 0.0        | 2.2        | 0.0        | 0.0        | 0.0        | 0.0        | 3.4        | 2.9        |
| AAAATAGAC            | 1                      | <i>mel</i>    | 4455.2     | 1.9        | 7.1        | 5.5        | 5.2        | 0.0        | 0.0        | 11.8       | 0.0        |
| AAATATAT             | 1                      | <i>mel</i>    | 3584.6     | 11.2       | 0.0        | 2.3        | 69.7       | 2.4        | 4.6        | 0.0        | 75.6       |
| AAATTACT             | 1                      | <i>mel</i>    | 4319.3     | 0.0        | 0.0        | 21.8       | 4.5        | 0.0        | 6.3        | 4.6        | 8.6        |
| AACATTGAAT           | 1                      | <i>mel</i>    | 982.7      | 0.0        | 0.0        | 2.1        | 0.0        | 0.0        | 0.0        | 0.0        | 0.0        |
| AAGAAGAGAG           | 1                      | <i>mel</i>    | 1393.7     | 0.0        | 3.3        | 0.0        | 0.0        | 0.0        | 0.0        | 0.0        | 5.2        |
| AAGACAAGACAC         | 1                      | <i>mel</i>    | 510.7      | 0.0        | 2.0        | 1.8        | 0.0        | 0.0        | 0.0        | 0.0        | 0.0        |
| AAGACAAGGAC          | 1                      | <i>mel</i>    | 677.2      | 0.0        | 0.0        | 0.0        | 0.0        | 0.0        | 0.0        | 0.0        | 0.0        |
| AAGACATGAC           | 1                      | <i>mel</i>    | 15576.5    | 59.8       | 54.3       | 22.4       | 33.8       | 0.0        | 0.0        | 4.1        | 17.6       |
| AAGACTAGAC           | 1                      | <i>mel</i>    | 8445.5     | 13.1       | 5.3        | 26.2       | 9.1        | 0.0        | 0.0        | 6.1        | 4.1        |
| AAGAGAAGAGAAGAG      | 1                      | <i>mel</i>    | 1258.0     | 13.1       | 0.0        | 0.0        | 0.0        | 0.0        | 0.0        | 0.0        | 0.0        |
| AAGAGAAGAGG          | 1                      | <i>mel</i>    | 950.8      | 0.0        | 1.5        | 0.0        | 3.5        | 0.0        | 0.0        | 0.0        | 0.0        |
| AAGAGAAGAT           | 1                      | <i>mel</i>    | 4571.2     | 0.0        | 11.0       | 0.0        | 4.0        | 0.0        | 0.0        | 0.0        | 0.0        |
| AAGAGAAGCG           | 1                      | <i>mel</i>    | 989.4      | 0.0        | 2.3        | 0.0        | 0.0        | 0.0        | 0.0        | 0.0        | 4.8        |
| AAGAGATGAG           | 1                      | <i>mel</i>    | 1890.0     | 120.2      | 0.0        | 0.0        | 0.0        | 0.0        | 0.0        | 4.1        | 0.0        |
| AAGAT                | 1                      | <i>mel</i>    | 58652.7    | 10.1       | 142.8      | 16.8       | 8.0        | 34.8       | 6.3        | 18.1       | 19.3       |
| AAGCAC               | 1                      | <i>mel</i>    | 1045.2     | 0.0        | 0.0        | 0.0        | 0.0        | 0.0        | 0.0        | 0.0        | 19.6       |
| AAGGC                | 1                      | <i>mel</i>    | 1920.0     | 0.0        | 8.1        | 0.0        | 3.0        | 0.0        | 8.9        | 35.2       | 22.2       |
| ACACG                | 1                      | <i>mel</i>    | 5588.9     | 0.0        | 13.0       | 1.5        | 0.0        | 6.0        | 0.0        | 2.2        | 2.6        |
| ACATAG               | 1                      | <i>mel</i>    | 6897.4     | 11.5       | 5.6        | 5.8        | 4.9        | 4.3        | 0.0        | 42.0       | 20.9       |
| ACATG                | 1                      | <i>mel</i>    | 3064.1     | 6.5        | 7.5        | 5.9        | 0.0        | 0.0        | 2.9        | 5.7        | 0.0        |
| AGAGG                | 1                      | <i>mel</i>    | 2325.4     | 1.5        | 0.0        | 5.2        | 0.0        | 19.5       | 18.4       | 0.0        | 3.0        |
| AGATGG               | 1                      | <i>mel</i>    | 18662.3    | 5.7        | 12.3       | 18.3       | 7.1        | 0.0        | 0.0        | 9.7        | 39.2       |
| AAAAAGTTATCGAAATCGAT | 1                      | <i>moj</i>    | 0.0        | 2.4        | 0.0        | 0.0        | 0.0        | 8.1        | 0.0        | 1994.0     | 0.0        |
| AAAGACT              | 1                      | <i>moj</i>    | 0.0        | 0.0        | 0.0        | 0.0        | 0.0        | 0.0        | 0.0        | 1132.0     | 0.0        |
| AAATG                | 1                      | <i>moj</i>    | 0.0        | 2.0        | 0.0        | 0.0        | 0.0        | 0.0        | 0.0        | 938.9      | 0.0        |
| AAGATAC              | 1                      | <i>moj</i>    | 0.0        | 0.0        | 0.0        | 1.5        | 0.0        | 0.0        | 0.0        | 3540.8     | 4.4        |
| AAGATAT              | 1                      | <i>moj</i>    | 19.3       | 0.0        | 4.0        | 0.0        | 0.0        | 7.8        | 0.0        | 1291.3     | 4.5        |
| AATGACT              | 1                      | <i>moj</i>    | 0.0        | 0.0        | 0.0        | 0.0        | 0.0        | 0.0        | 0.0        | 1862.6     | 0.0        |
| AATGAGT              | 1                      | <i>moj</i>    | 0.0        | 0.0        | 0.0        | 0.0        | 0.0        | 0.0        | 0.0        | 1538.7     | 0.0        |
| ACAGCAT              | 1                      | <i>moj</i>    | 76.5       | 74.2       | 26.6       | 55.9       | 155.6      | 130.3      | 87.1       | 20118.3    | 99.7       |
| ACATAGAT             | 1                      | <i>moj</i>    | 3.2        | 0.0        | 0.0        | 1.6        | 0.0        | 0.0        | 0.0        | 9230.7     | 159.6      |
| ACCTCT               | 1                      | <i>moj</i>    | 2.6        | 0.0        | 0.0        | 0.0        | 0.0        | 0.0        | 0.0        | 1723.7     | 0.0        |
| ACTATCT              | 1                      | <i>moj</i>    | 0.0        | 0.0        | 0.0        | 0.0        | 27.8       | 0.0        | 0.0        | 1077.0     | 0.0        |
| ACTGATAT             | 1                      | <i>moj</i>    | 0.0        | 0.0        | 0.0        | 0.0        | 0.0        | 0.0        | 0.0        | 2112.3     | 0.0        |
| AGGATAT              | 1                      | <i>moj</i>    | 0.0        | 0.0        | 34.3       | 0.0        | 114.2      | 0.0        | 0.0        | 1151.7     | 176.6      |
| AAAACATGTTCGAAC      | 1                      | <i>sec</i>    | 0.0        | 68.9       | 1195.2     | 0.0        | 0.0        | 0.0        | 0.0        | 0.0        | 3.4        |
| AAAAGAAAAGAAATAG     | 1                      | <i>sec</i>    | 0.0        | 1.6        | 1521.9     | 0.0        | 0.0        | 0.0        | 0.0        | 0.0        | 0.0        |
| AAAAGAATAG           | 1                      | <i>sec</i>    | 3.6        | 0.0        | 19415.4    | 0.0        | 7.8        | 0.0        | 0.0        | 7.3        | 3.2        |
| AAAAGAATAGAAATAG     | 1                      | <i>sec</i>    | 0.0        | 0.0        | 1338.4     | 0.0        | 0.0        | 0.0        | 3.5        | 0.0        | 0.0        |
| AACAGAACATGTTTC      | 1                      | <i>sec</i>    | 0.0        | 32.3       | 3429.3     | 0.0        | 0.0        | 0.0        | 3.1        | 0.0        | 0.0        |
| AACAAGTCTGTTCG       | 1                      | <i>sec</i>    | 0.0        | 0.0        | 1281.3     | 0.0        | 0.0        | 0.0        | 0.0        | 0.0        | 2.7        |
| AACAATT              | 1                      | <i>sec</i>    | 0.0        | 116.7      | 562.8      | 0.0        | 0.0        | 0.0        | 0.0        | 0.0        | 58.2       |
| AACACAGAACAGAACAG    | 1                      | <i>sec</i>    | 0.0        | 0.0        | 1782.0     | 0.0        | 0.0        | 0.0        | 0.0        | 0.0        | 0.0        |
| AACAGAACATGATCG      | 1                      | <i>sec</i>    | 0.0        | 3.0        | 637.2      | 0.0        | 0.0        | 0.0        | 0.0        | 0.0        | 0.0        |
| AACAGAACATGTTCC      | 1                      | <i>sec</i>    | 0.0        | 1.7        | 2304.0     | 0.0        | 0.0        | 0.0        | 0.0        | 0.0        | 0.0        |
| AACAGAACATGTTCGAATAG | 1                      | <i>sec</i>    | 2.3        | 0.0        | 1345.1     | 0.0        | 0.0        | 0.0        | 0.0        | 0.0        | 0.0        |
| AACAGAACCG           | 1                      | <i>sec</i>    | 0.0        | 0.0        | 2486.9     | 0.0        | 0.0        | 0.0        | 0.0        | 0.0        | 4.1        |
| AACAGATCATGTTCCG     | 1                      | <i>sec</i>    | 0.0        | 0.0        | 1053.6     | 0.0        | 0.0        | 0.0        | 0.0        | 0.0        | 0.0        |
| AACATGTTCTGACAG      | 1                      | <i>sec</i>    | 7.6        | 4.9        | 17796.7    | 6.2        | 0.0        | 3.2        | 6.3        | 2.5        | 14.3       |
| AACCG                | 1                      | <i>sec</i>    | 0.0        | 0.0        | 862.6      | 0.0        | 0.0        | 0.0        | 0.0        | 2.6        | 0.0        |
| AATATAATATAT         | 1                      | <i>sec</i>    | 97.9       | 71.4       | 545.3      | 6.0        | 0.0        | 0.0        | 0.0        | 0.0        | 0.0        |
| AAAACAAC             | 1                      | <i>sim</i>    | 0.0        | 2266.4     | 14.1       | 0.0        | 0.0        | 0.0        | 0.0        | 0.0        | 0.0        |
| AAATAAC              | 1                      | <i>sim</i>    | 4.2        | 875.6      | 0.0        | 2.4        | 0.0        | 0.0        | 0.0        | 0.0        | 16.3       |
| AACAATC              | 1                      | <i>sim</i>    | 0.0        | 9308.4     | 2.5        | 0.0        | 0.0        | 0.0        | 0.0        | 3.4        | 18.8       |
| AACAGAACATAATCG      | 1                      | <i>sim</i>    | 0.0        | 1900.1     | 145.8      | 0.0        | 0.0        | 0.0        | 0.0        | 0.0        | 2.9        |
| AAGAGAAGTG           | 1                      | <i>sim</i>    | 117.2      | 952.0      | 0.0        | 0.0        | 0.0        | 0.0        | 0.0        | 0.0        | 5.1        |
| AAGAGAATAG           | 1                      | <i>sim</i>    | 16.4       | 32479.6    | 0.0        | 0.0        | 0.0        | 8.4        | 0.0        | 3.3        | 10.4       |
| AATAGAATCG           | 1                      | <i>sim</i>    | 2.4        | 1416.7     | 0.0        | 0.0        | 0.0        | 0.0        | 0.0        | 0.0        | 0.0        |
| AATAGAATGG           | 1                      | <i>sim</i>    | 0.0        | 2509.2     | 0.0        | 0.0        | 0.0        | 0.0        | 0.0        | 0.0        | 0.0        |

|                       |   |         |          |         |          |       |         |       |      |         |          |
|-----------------------|---|---------|----------|---------|----------|-------|---------|-------|------|---------|----------|
| AATAGAATTG            | 1 | sim     | 4.5      | 30027.5 | 22.5     | 0.0   | 0.0     | 7.0   | 0.0  | 4.5     | 5.5      |
| AATGG                 | 1 | sim     | 7.2      | 606.8   | 80.2     | 5.1   | 12.6    | 5.9   | 4.1  | 27.2    | 3.3      |
| ACGGAGTACGGG          | 1 | sim     | 0.0      | 1768.2  | 0.0      | 0.0   | 0.0     | 85.6  | 0.0  | 2.5     | 0.0      |
| AAAAACAAAC            | 1 | vir     | 0.0      | 0.0     | 10.2     | 0.0   | 0.0     | 6.2   | 0.0  | 0.0     | 1324.6   |
| AAAAACT               | 1 | vir     | 2.7      | 0.0     | 0.0      | 0.0   | 0.0     | 0.0   | 0.0  | 0.0     | 3479.1   |
| AAAC                  | 1 | vir     | 0.0      | 12.8    | 2.9      | 0.0   | 7.4     | 0.0   | 4.4  | 21.5    | 27902.4  |
| AAACAAGC              | 1 | vir     | 0.0      | 0.0     | 2.7      | 0.0   | 0.0     | 0.0   | 0.0  | 0.0     | 1913.9   |
| AAACAGAC              | 1 | vir     | 2.1      | 0.0     | 2.2      | 0.0   | 0.0     | 0.0   | 3.9  | 3.1     | 840.9    |
| AAACCAT               | 1 | vir     | 17.5     | 0.0     | 0.0      | 0.0   | 0.0     | 0.0   | 0.0  | 0.0     | 566.9    |
| AAACTAG               | 1 | vir     | 0.0      | 0.0     | 0.0      | 0.0   | 0.0     | 0.0   | 0.0  | 0.0     | 2903.6   |
| AAACTAT               | 1 | vir     | 39.8     | 17.9    | 34.5     | 48.6  | 25.8    | 94.7  | 76.1 | 47.3    | 490963.3 |
| AAATCAAC              | 1 | vir     | 0.0      | 0.0     | 0.0      | 0.0   | 0.0     | 0.0   | 0.0  | 0.0     | 5708.4   |
| AAATCAACAATCCAAC      | 1 | vir     | 3.1      | 0.0     | 0.0      | 0.0   | 2.6     | 0.0   | 0.0  | 0.0     | 2978.1   |
| AAATCAT               | 1 | vir     | 0.0      | 0.0     | 0.0      | 0.0   | 0.0     | 0.0   | 0.0  | 0.0     | 934.0    |
| AAATTAC               | 1 | vir     | 50.5     | 20.7    | 36.8     | 34.6  | 68.7    | 109.0 | 62.6 | 47.7    | 540644.8 |
| AACAAT                | 1 | vir     | 0.0      | 0.0     | 0.0      | 0.0   | 0.0     | 0.0   | 0.0  | 13.8    | 2120.1   |
| AACAATCC              | 1 | vir     | 0.0      | 0.0     | 0.0      | 0.0   | 0.0     | 0.0   | 0.0  | 0.0     | 6288.4   |
| AACACAGACAGAC         | 1 | vir     | 0.0      | 0.0     | 0.0      | 1.6   | 0.0     | 0.0   | 2.5  | 0.0     | 743.3    |
| AACACAGACAGACAGAC     | 1 | vir     | 1.8      | 0.0     | 0.0      | 0.0   | 0.0     | 2.9   | 0.0  | 7.7     | 1528.7   |
| AACATAG               | 1 | vir     | 0.0      | 0.0     | 0.0      | 0.0   | 0.0     | 0.0   | 0.0  | 77.1    | 993.4    |
| AACTACT               | 1 | vir     | 0.0      | 0.0     | 0.0      | 0.0   | 0.0     | 0.0   | 0.0  | 0.0     | 1479.9   |
| AAGTAC                | 1 | vir     | 3.1      | 0.0     | 0.0      | 0.0   | 0.0     | 0.0   | 0.0  | 2.4     | 3037.3   |
| AATAATAG              | 1 | vir     | 0.0      | 0.0     | 0.0      | 0.0   | 0.0     | 0.0   | 0.0  | 0.0     | 6217.6   |
| AATAGATT              | 1 | vir     | 0.0      | 0.0     | 0.0      | 0.0   | 3.0     | 5.0   | 0.0  | 0.0     | 4231.0   |
| AATATATC              | 1 | vir     | 0.0      | 0.0     | 0.0      | 0.0   | 0.0     | 0.0   | 0.0  | 0.0     | 2896.2   |
| AATATC                | 1 | vir     | 0.0      | 0.0     | 2.0      | 3.3   | 0.0     | 0.0   | 0.0  | 58.6    | 13161.6  |
| AATCAATT              | 1 | vir     | 3.2      | 0.0     | 0.0      | 0.0   | 0.0     | 0.0   | 0.0  | 0.0     | 2624.5   |
| AATCTAT               | 1 | vir     | 4.2      | 0.0     | 0.0      | 0.0   | 0.0     | 0.0   | 0.0  | 42.6    | 1923.3   |
| ACACACAG              | 1 | vir     | 0.0      | 0.0     | 0.0      | 0.0   | 0.0     | 0.0   | 0.0  | 2.9     | 824.9    |
| ACACACAT              | 1 | vir     | 0.0      | 0.0     | 0.0      | 0.0   | 0.0     | 0.0   | 2.7  | 2.4     | 2402.8   |
| ACAGACAGACAGAGAGAG    | 1 | vir     | 0.0      | 0.0     | 0.0      | 0.0   | 0.0     | 0.0   | 0.0  | 0.0     | 1413.4   |
| ACAGACAGACCCAG        | 1 | vir     | 0.0      | 0.0     | 0.0      | 2.0   | 3.1     | 0.0   | 0.0  | 0.0     | 3708.5   |
| ACAGACAGAGAG          | 1 | vir     | 0.0      | 0.0     | 0.0      | 2.5   | 3.5     | 0.0   | 0.0  | 2.6     | 1171.3   |
| ACAGACAGGCAG          | 1 | vir     | 2.6      | 3.7     | 4.3      | 5.0   | 2.4     | 3.1   | 12.0 | 12.2    | 2588.3   |
| ACAGGCAG              | 1 | vir     | 0.0      | 7.0     | 2.4      | 0.0   | 12.9    | 0.0   | 5.7  | 0.0     | 2316.2   |
| ACATACCT              | 1 | vir     | 0.0      | 0.0     | 0.0      | 23.1  | 0.0     | 0.0   | 0.0  | 0.0     | 1127.7   |
| ACTC                  | 1 | vir     | 0.0      | 0.0     | 0.0      | 0.0   | 17.9    | 29.2  | 7.4  | 77.2    | 635.3    |
| ACTCAT                | 1 | vir     | 0.0      | 1.9     | 2.0      | 5.0   | 56.8    | 4.3   | 0.0  | 65.5    | 23498.1  |
| ACAGAG                | 2 | ana moj | 4.9      | 2.3     | 2.9      | 0.0   | 3878.8  | 0.0   | 4.4  | 280.4   | 22.2     |
| ACTGAG                | 2 | ana moj | 0.0      | 0.0     | 0.0      | 0.0   | 386.1   | 0.0   | 0.0  | 1152.4  | 0.0      |
| AACTATT               | 2 | ana vir | 0.0      | 0.0     | 0.0      | 0.0   | 206.4   | 0.0   | 0.0  | 0.0     | 12891.5  |
| AAGACAGAC             | 2 | ana vir | 0.0      | 0.0     | 0.0      | 0.0   | 415.8   | 0.0   | 0.0  | 0.0     | 3054.2   |
| ACAGACAGACAGG         | 2 | ana vir | 18.4     | 3.3     | 2.1      | 7.8   | 89885.2 | 0.0   | 0.0  | 2.8     | 1906.2   |
| ACAGACAGG             | 2 | ana vir | 4.5      | 3.9     | 2.1      | 2.4   | 43607.6 | 0.0   | 5.1  | 8.6     | 3148.2   |
| ACAGAGAG              | 2 | ana vir | 0.0      | 0.0     | 0.0      | 2.1   | 1691.7  | 0.0   | 0.0  | 0.0     | 322.1    |
| AAATTAT               | 2 | mel ere | 1189.1   | 0.0     | 0.0      | 239.0 | 0.0     | 0.0   | 0.0  | 0.0     | 31.1     |
| AAAGAC                | 2 | mel moj | 19269.7  | 8.5     | 23.2     | 15.2  | 19.7    | 4.3   | 0.0  | 364.6   | 13.3     |
| AAAGAG                | 2 | mel moj | 5486.7   | 0.0     | 0.0      | 0.0   | 52.7    | 3.8   | 0.0  | 318.1   | 4.3      |
| AAGAGG                | 2 | mel moj | 36660.2  | 12.9    | 13.4     | 16.2  | 29.4    | 7.9   | 0.0  | 226.4   | 34.9     |
| AAGGAG                | 2 | mel moj | 23174.2  | 13.2    | 13.5     | 9.1   | 7.6     | 4.0   | 26.6 | 515.9   | 29.9     |
| AAAC                  | 2 | mel sec | 152057.0 | 135.6   | 239.4    | 120.0 | 99.0    | 20.2  | 47.3 | 98.5    | 94.8     |
| AACAGAG               | 2 | mel sec | 11192.3  | 6.7     | 855.2    | 10.7  | 27.0    | 7.4   | 0.0  | 12.1    | 0.0      |
| AATAC                 | 2 | mel sec | 32452.9  | 58.3    | 308.8    | 89.0  | 27.0    | 0.0   | 0.0  | 40.8    | 4.8      |
| AATGT                 | 2 | mel sec | 1125.9   | 169.6   | 549.0    | 0.0   | 0.0     | 13.5  | 0.0  | 0.0     | 0.0      |
| ACCACTACGGG           | 2 | mel sec | 65769.9  | 124.4   | 3875.2   | 60.7  | 60.5    | 13.3  | 15.1 | 43.3    | 25.1     |
| ACGAG                 | 2 | mel sec | 2016.5   | 2.4     | 279.3    | 0.0   | 0.0     | 2.7   | 0.0  | 0.0     | 3.3      |
| AAGAGAAGAGAG          | 2 | mel sim | 7220.1   | 3238.2  | 10.6     | 1.9   | 9.2     | 6.2   | 0.0  | 0.0     | 20.4     |
| AAGAGAG               | 2 | mel sim | 63244.3  | 1402.0  | 85.1     | 50.1  | 35.9    | 24.1  | 13.7 | 48.6    | 62.0     |
| AAAAC                 | 2 | mel vir | 881.0    | 0.0     | 2.3      | 0.0   | 3.1     | 0.0   | 6.8  | 0.0     | 842.2    |
| AAACAC                | 2 | mel vir | 30850.7  | 6.2     | 39.6     | 16.2  | 34.1    | 0.0   | 3.8  | 6.9     | 1028.8   |
| AATAGAC               | 2 | mel vir | 17625.2  | 11.5    | 44.2     | 15.5  | 6.6     | 4.7   | 13.7 | 18.5    | 822.4    |
| ACAGACCAG             | 2 | mel vir | 978.2    | 3.7     | 0.0      | 0.0   | 0.0     | 0.0   | 0.0  | 0.0     | 2010.4   |
| AAGTAG                | 2 | maj vir | 11.0     | 1.7     | 2.2      | 0.0   | 0.0     | 0.0   | 0.0  | 7795.3  | 2857.5   |
| AATATAG               | 2 | maj vir | 8.5      | 22.2    | 6.0      | 4.7   | 0.0     | 0.0   | 0.0  | 1812.5  | 20562.1  |
| AATATG                | 2 | maj vir | 0.0      | 4.7     | 3.0      | 0.0   | 0.0     | 0.0   | 0.0  | 4168.4  | 510.3    |
| AATGAC                | 2 | maj vir | 9.3      | 9.3     | 4.4      | 0.0   | 0.0     | 24.7  | 9.3  | 21469.1 | 4375.3   |
| ACACAT                | 2 | maj vir | 0.0      | 2.1     | 0.0      | 4.6   | 0.0     | 9.5   | 3.1  | 206.9   | 10176.6  |
| ACTAGAG               | 2 | maj vir | 0.0      | 2.4     | 1.3      | 0.0   | 0.0     | 0.0   | 0.0  | 1974.4  | 535.5    |
| ACTAGAT               | 2 | maj vir | 0.0      | 0.0     | 0.0      | 0.0   | 67.0    | 0.0   | 26.4 | 3149.1  | 643.4    |
| AGAGAT                | 2 | maj vir | 12.6     | 2.1     | 0.0      | 0.0   | 0.0     | 0.0   | 0.0  | 8403.0  | 6236.4   |
| AGCATAT               | 2 | maj vir | 0.0      | 0.0     | 0.0      | 0.0   | 0.0     | 0.0   | 0.0  | 1114.7  | 457.9    |
| ATATATC               | 2 | maj vir | 0.0      | 0.0     | 0.0      | 2.5   | 0.0     | 0.0   | 0.0  | 803.7   | 479.1    |
| AAAAT                 | 2 | sec moj | 15.3     | 17.7    | 740.9    | 2.3   | 5.5     | 9.3   | 2.9  | 7842.2  | 7.9      |
| AAATGT                | 2 | sec moj | 0.0      | 19.9    | 3312.5   | 0.0   | 0.0     | 0.0   | 0.0  | 229.7   | 0.0      |
| ACTG                  | 2 | sec vir | 119.5    | 73.9    | 261.8    | 140.5 | 14.3    | 72.3  | 47.9 | 133.2   | 2633.9   |
| AAACATGTTCTGTTC       | 2 | sim sec | 0.0      | 348.8   | 3051.3   | 0.0   | 0.0     | 0.0   | 0.0  | 0.0     | 0.0      |
| AACAG                 | 2 | sim sec | 188.1    | 57774.8 | 291904.7 | 36.2  | 33.5    | 17.8  | 43.5 | 50.6    | 162.7    |
| AACAGAACAGAACATGTTCCG | 2 | sim sec | 0.0      | 1222.9  | 4920.4   | 0.0   | 0.0     | 0.0   | 0.0  | 0.0     | 5.8      |
| AACAGAATAG            | 2 | sim sec | 2.4      | 3583.3  | 2563.8   | 0.0   | 0.0     | 0.0   | 0.0  | 0.0     | 0.0      |

|                  |   |     |     |      |          |         |          |           |          |          |          |          |          |          |          |          |          |          |           |
|------------------|---|-----|-----|------|----------|---------|----------|-----------|----------|----------|----------|----------|----------|----------|----------|----------|----------|----------|-----------|
| AACATGTTCCGTTCCG | 2 | sim | sec | 2.1  | 458.3    | 2945.0  | 1.5      | 3.5       | 0.0      | 0.0      | 0.0      | 0.0      |          |          |          |          |          |          |           |
| AACATGTTCCG      | 2 | sim | sec | 33.0 | 42661.8  | 65746.5 | 8.2      | 0.0       | 7.6      | 12.4     | 5.0      | 34.8     |          |          |          |          |          |          |           |
| AATTC            | 2 | sim | sec | 25.4 | 8860.2   | 49597.2 | 52.4     | 0.0       | 6.2      | 4.2      | 2.7      | 7.0      |          |          |          |          |          |          |           |
| AAACAAC          | 2 | sim | vir | 5.7  | 25910.2  | 29.8    | 0.0      | 0.0       | 0.0      | 0.0      | 3.6      | 10421.0  |          |          |          |          |          |          |           |
| AAGTAT           | 3 | ana | moj | vir  | 5.9      | 0.0     | 8.0      | 0.0       | 460.5    | 0.0      | 0.0      | 4934.8   | 735.3    |          |          |          |          |          |           |
| AATGAT           | 3 | ana | moj | vir  | 0.0      | 0.0     | 0.0      | 0.0       | 293.9    | 0.0      | 0.0      | 614.1    | 3959.9   |          |          |          |          |          |           |
| ACTCTCT          | 3 | ana | moj | vir  | 0.0      | 0.0     | 0.0      | 0.0       | 648.5    | 2.3      | 0.0      | 5937.5   | 393.8    |          |          |          |          |          |           |
| AAATAAT          | 3 | mel | ana | moj  | 642.9    | 0.0     | 1.5      | 1.8       | 517.8    | 23.9     | 16.1     | 3319.5   | 107.1    |          |          |          |          |          |           |
| AACATAT          | 3 | mel | moj | vir  | 2299.6   | 5.4     | 7.9      | 0.0       | 0.0      | 7.6      | 0.0      | 533.7    | 413.2    |          |          |          |          |          |           |
| AAGAC            | 3 | mel | sec | ana  | 142243.5 | 84.2    | 248.7    | 140.4     | 208.0    | 31.7     | 36.5     | 150.1    | 56.9     |          |          |          |          |          |           |
| AAAAC            | 3 | mel | sec | moj  | 9012.6   | 2.0     | 7572.3   | 2.8       | 0.0      | 11.9     | 17.1     | 1429.5   | 136.8    |          |          |          |          |          |           |
| AAAAG            | 3 | mel | sec | moj  | 17765.5  | 4.9     | 289.6    | 15.6      | 8.9      | 13.9     | 7.4      | 1081.8   | 11.0     |          |          |          |          |          |           |
| AAACAAT          | 3 | mel | sim | ana  | 6946.3   | 2569.4  | 6.8      | 16.5      | 365.8    | 5.5      | 0.0      | 6.6      | 19.1     |          |          |          |          |          |           |
| AGATG            | 3 | mel | sim | moj  | 12665.5  | 233.1   | 2.0      | 20.4      | 6.4      | 7.5      | 0.0      | 1371.0   | 14.1     |          |          |          |          |          |           |
| AACTTAAT         | 3 | mel | sim | sec  | 231.4    | 211.4   | 834.9    | 0.0       | 0.0      | 0.0      | 0.0      | 0.0      | 0.0      |          |          |          |          |          |           |
| AATAATAT         | 3 | mel | sim | sec  | 20524.0  | 435.7   | 7812.8   | 21.4      | 54.2     | 8.5      | 11.2     | 71.3     | 22.4     |          |          |          |          |          |           |
| ACCGAGTACGGG     | 3 | mel | sim | sec  | 10757.6  | 68974.0 | 15762.2  | 4.1       | 10.6     | 0.0      | 22.7     | 29.3     | 36.2     |          |          |          |          |          |           |
| ACTGGG           | 3 | mel | sim | sec  | 985.0    | 500.8   | 756.6    | 2.0       | 130.2    | 0.0      | 28.4     | 0.0      | 0.0      |          |          |          |          |          |           |
| AAATAC           | 3 | sec | pse | per  | 0.0      | 0.0     | 3705.0   | 0.0       | 0.0      | 1063.2   | 1720.4   | 182.9    | 28.5     |          |          |          |          |          |           |
| AATAGT           | 3 | sim | ere | moj  | 0.0      | 4894.7  | 0.0      | 934.2     | 0.0      | 0.0      | 0.0      | 202.2    | 123.5    |          |          |          |          |          |           |
| ACTCTAT          | 3 | sim | moj | vir  | 0.0      | 215.1   | 0.0      | 0.0       | 0.0      | 4.7      | 0.0      | 1018.0   | 590.2    |          |          |          |          |          |           |
| ACAGACGG         | 4 | ana | pse | per  | moj      | 2.3     | 1.7      | 0.0       | 84.1     | 2043.4   | 2154.0   | 1856.3   | 5751.0   | 15.6     |          |          |          |          |           |
| ACAT             | 4 | ere | per | moj  | vir      | 34.3    | 35.5     | 48.9      | 44313.1  | 135.5    | 30.9     | 257.8    | 986.1    | 29584.1  |          |          |          |          |           |
| AAATAT           | 4 | mel | ere | moj  | vir      | 318.8   | 0.0      | 0.0       | 9169.5   | 153.2    | 161.9    | 0.0      | 4846.6   | 7147.0   |          |          |          |          |           |
| AAAT             | 4 | mel | pse | moj  | vir      | 522.2   | 100.2    | 4.2       | 117.0    | 126.6    | 296.6    | 104.4    | 1910.7   | 16802.8  |          |          |          |          |           |
| AATACT           | 4 | mel | sec | moj  | vir      | 1058.2  | 4.0      | 4553.2    | 0.0      | 0.0      | 0.0      | 0.0      | 596.5    | 477.3    |          |          |          |          |           |
| AAAATAT          | 4 | mel | sim | sec  | moj      | 5867.0  | 1174.3   | 5179.4    | 117.8    | 4.3      | 14.0     | 29.7     | 5278.4   | 51.2     |          |          |          |          |           |
| AACAGAACATGTTCCG | 4 | mel | sim | sec  | vir      | 509.4   | 503360.9 | 1159389.0 | 114.0    | 93.4     | 129.3    | 237.0    | 144.1    | 707.3    |          |          |          |          |           |
| ACGG             | 4 | pse | per | moj  | vir      | 0.0     | 2.8      | 0.0       | 42.9     | 32.2     | 519.1    | 618.6    | 5564.1   | 1115.0   |          |          |          |          |           |
| ATC              | 4 | pse | per | moj  | vir      | 61.9    | 6.2      | 70.3      | 37.0     | 113.0    | 262.2    | 345.1    | 675.0    | 1115.0   |          |          |          |          |           |
| AGATATAT         | 4 | sim | sec | moj  | vir      | 0.0     | 7538.6   | 2592.9    | 0.0      | 0.0      | 7.3      | 71.6     | 389.8    | 376.4    |          |          |          |          |           |
| AGATAT           | 5 | mel | ana | per  | moj      | vir     | 288.4    | 5.4       | 5.8      | 144.0    | 293.2    | 124.5    | 410.0    | 20812.8  | 19896.9  |          |          |          |           |
| AACATAGAAT       | 5 | mel | sec | ere  | ana      | moj     | 266251.0 | 115.5     | 569.6    | 500.2    | 434.3    | 102.4    | 36.2     | 283.6    | 125.6    |          |          |          |           |
| AATAG            | 5 | mel | sim | sec  | ere      | vir     | 19464.8  | 63476.8   | 120924.0 | 12174.0  | 77.3     | 83.4     | 124.5    | 21.1     | 424.5    |          |          |          |           |
| ACATAT           | 6 | ere | ana | pse  | per      | moj     | vir      | 23.0      | 71.4     | 83.4     | 2483.1   | 702.2    | 483.6    | 379.6    | 4578.4   | 24824.3  |          |          |           |
| AATATAT          | 6 | mel | sim | sec  | ere      | moj     | vir      | 37435.5   | 11844.0  | 2696.7   | 704.1    | 198.3    | 96.4     | 16.9     | 931.6    | 241.1    |          |          |           |
| ACATATAT         | 6 | mel | sim | sec  | ere      | moj     | vir      | 42977.2   | 842.1    | 609.1    | 278.7    | 33.1     | 14.8     | 5.0      | 756.9    | 459.8    |          |          |           |
| ACT              | 7 | mel | ere | ana  | pse      | per     | moj      | vir       | 273.3    | 164.1    | 131.7    | 720.7    | 606.0    | 296.5    | 208.8    | 9271.3   | 482.9    |          |           |
| ACAGAT           | 7 | mel | sim | sec  | ere      | ana     | moj      | vir       | 1128.6   | 2292.1   | 429.1    | 783.8    | 276.5    | 156.3    | 91.1     | 107161.6 | 42925.7  |          |           |
| AATAT            | 8 | mel | sim | sec  | ere      | ana     | per      | moj       | vir      | 190434.3 | 119042.8 | 195483.8 | 383.4    | 326.1    | 87.9     | 286.7    | 630.2    | 498.1    |           |
| AAGAG            | 8 | mel | sim | sec  | ere      | ana     | pse      | moj       | vir      | 428334.6 | 26434.7  | 1289.4   | 285.1    | 285.4    | 222.9    | 121.8    | 1035.6   | 882.1    |           |
| A                | 9 | mel | sim | sec  | ere      | ana     | pse      | per       | moj      | vir      | 202790.7 | 116912.0 | 155114.7 | 105529.2 | 202338.4 | 103320.7 | 144832.4 | 663993.5 | 325066.9  |
| AAACTAC          | 9 | mel | sim | sec  | ere      | ana     | pse      | per       | moj      | vir      | 598.1    | 398.0    | 419.2    | 572.5    | 467.7    | 585.1    | 637.4    | 734.8    | 7099097.1 |
| AAC              | 9 | mel | sim | sec  | ere      | ana     | pse      | per       | moj      | vir      | 868.4    | 643.6    | 435.6    | 417.3    | 1983.8   | 2517.2   | 2210.8   | 7975.9   | 16927.7   |
| AAT              | 9 | mel | sim | sec  | ere      | ana     | pse      | per       | moj      | vir      | 8596.4   | 15509.1  | 37205.6  | 3249.6   | 950.9    | 2237.1   | 1120.4   | 8924.9   | 18776.6   |
| AC               | 9 | mel | sim | sec  | ere      | ana     | pse      | per       | moj      | vir      | 1782.0   | 580.8    | 747.2    | 1707.6   | 1411.4   | 4789.3   | 5733.8   | 76098.8  | 191675.4  |
| ACAG             | 9 | mel | sim | sec  | ere      | ana     | pse      | per       | moj      | vir      | 318.6    | 264.5    | 299.2    | 243.2    | 51142.1  | 435.1    | 395.5    | 418.8    | 356835.7  |
| AG               | 9 | mel | sim | sec  | ere      | ana     | pse      | per       | moj      | vir      | 1032.6   | 539.5    | 364.5    | 1454.1   | 379.7    | 6132.6   | 8626.6   | 100593.8 | 51167.6   |
| AGAT             | 9 | mel | sim | sec  | ere      | ana     | pse      | per       | moj      | vir      | 33705.8  | 17899.9  | 159424.8 | 819.1    | 350.2    | 982.1    | 702.4    | 4112.2   | 1882.0    |
| AGC              | 9 | mel | sim | sec  | ere      | ana     | pse      | per       | moj      | vir      | 3972.1   | 3724.9   | 3380.2   | 7660.2   | 2995.7   | 7238.3   | 7395.0   | 20935.0  | 8379.8    |
| AT               | 9 | mel | sim | sec  | ere      | ana     | pse      | per       | moj      | vir      | 7373.0   | 6152.2   | 5515.9   | 3402.8   | 2481.9   | 4389.8   | 4094.1   | 61694.3  | 43027.9   |
| C                | 9 | mel | sim | sec  | ere      | ana     | pse      | per       | moj      | vir      | 12592.2  | 6005.6   | 8920.8   | 5944.0   | 8438.6   | 37373.7  | 32076.0  | 9994.3   | 20668.6   |

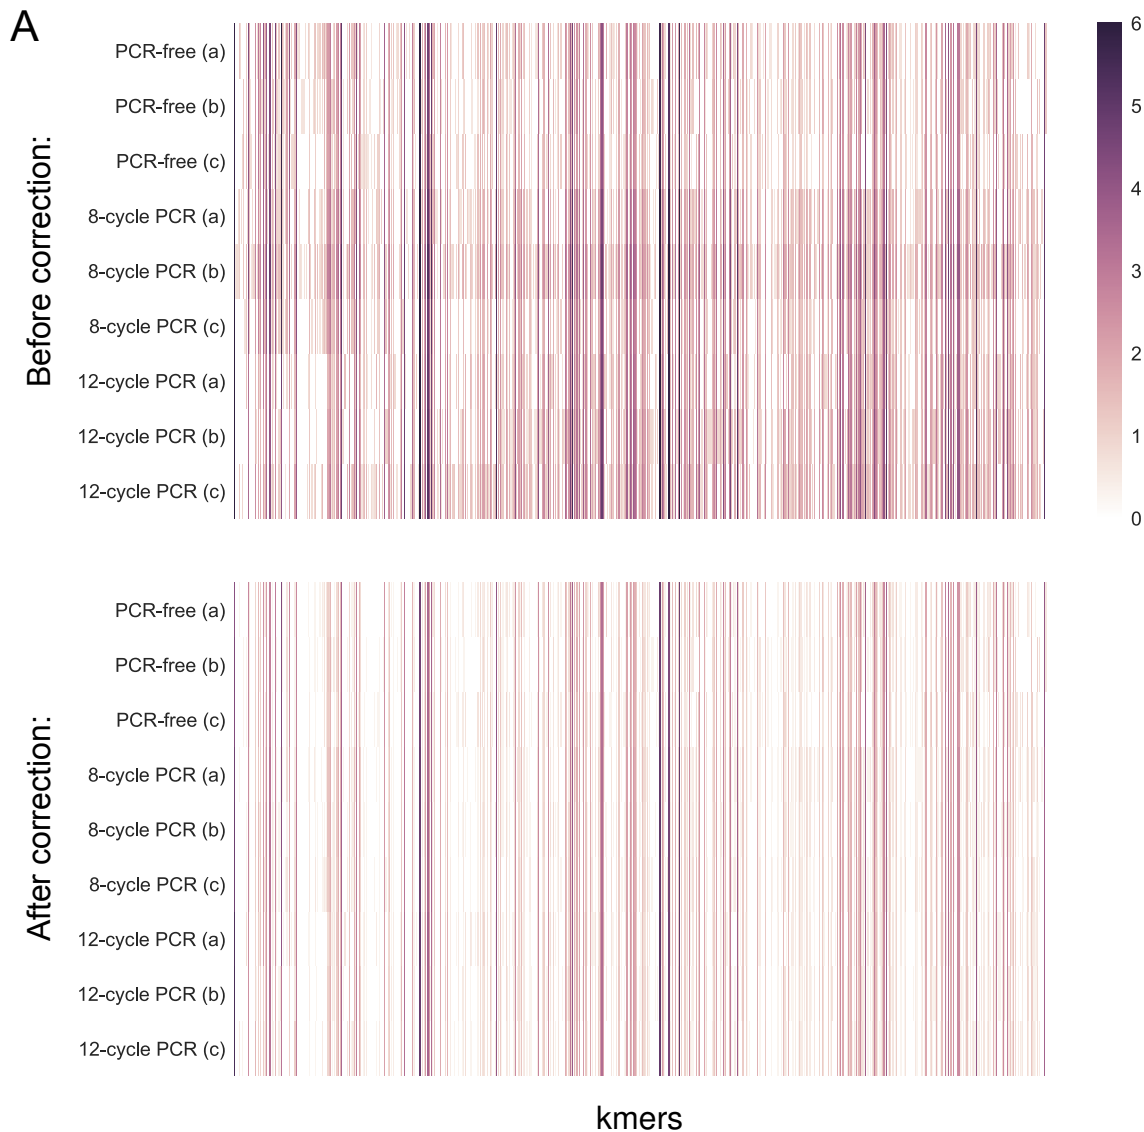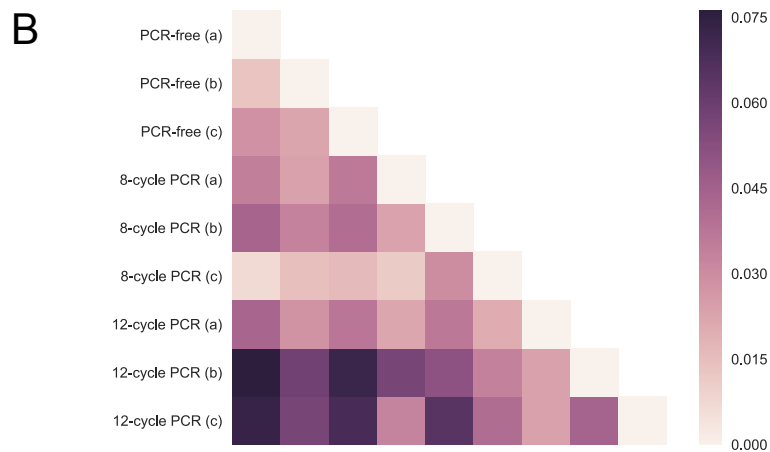

Supplementary Figure 1. Correction for GC bias for different library preparations. A. Heatmap of kmer log-abundances in base pairs, before (top) and after (bottom) correction for GC bias. B. Change in pairwise Spearman correlation coefficient among replicates for each library preparations after to GC correction.

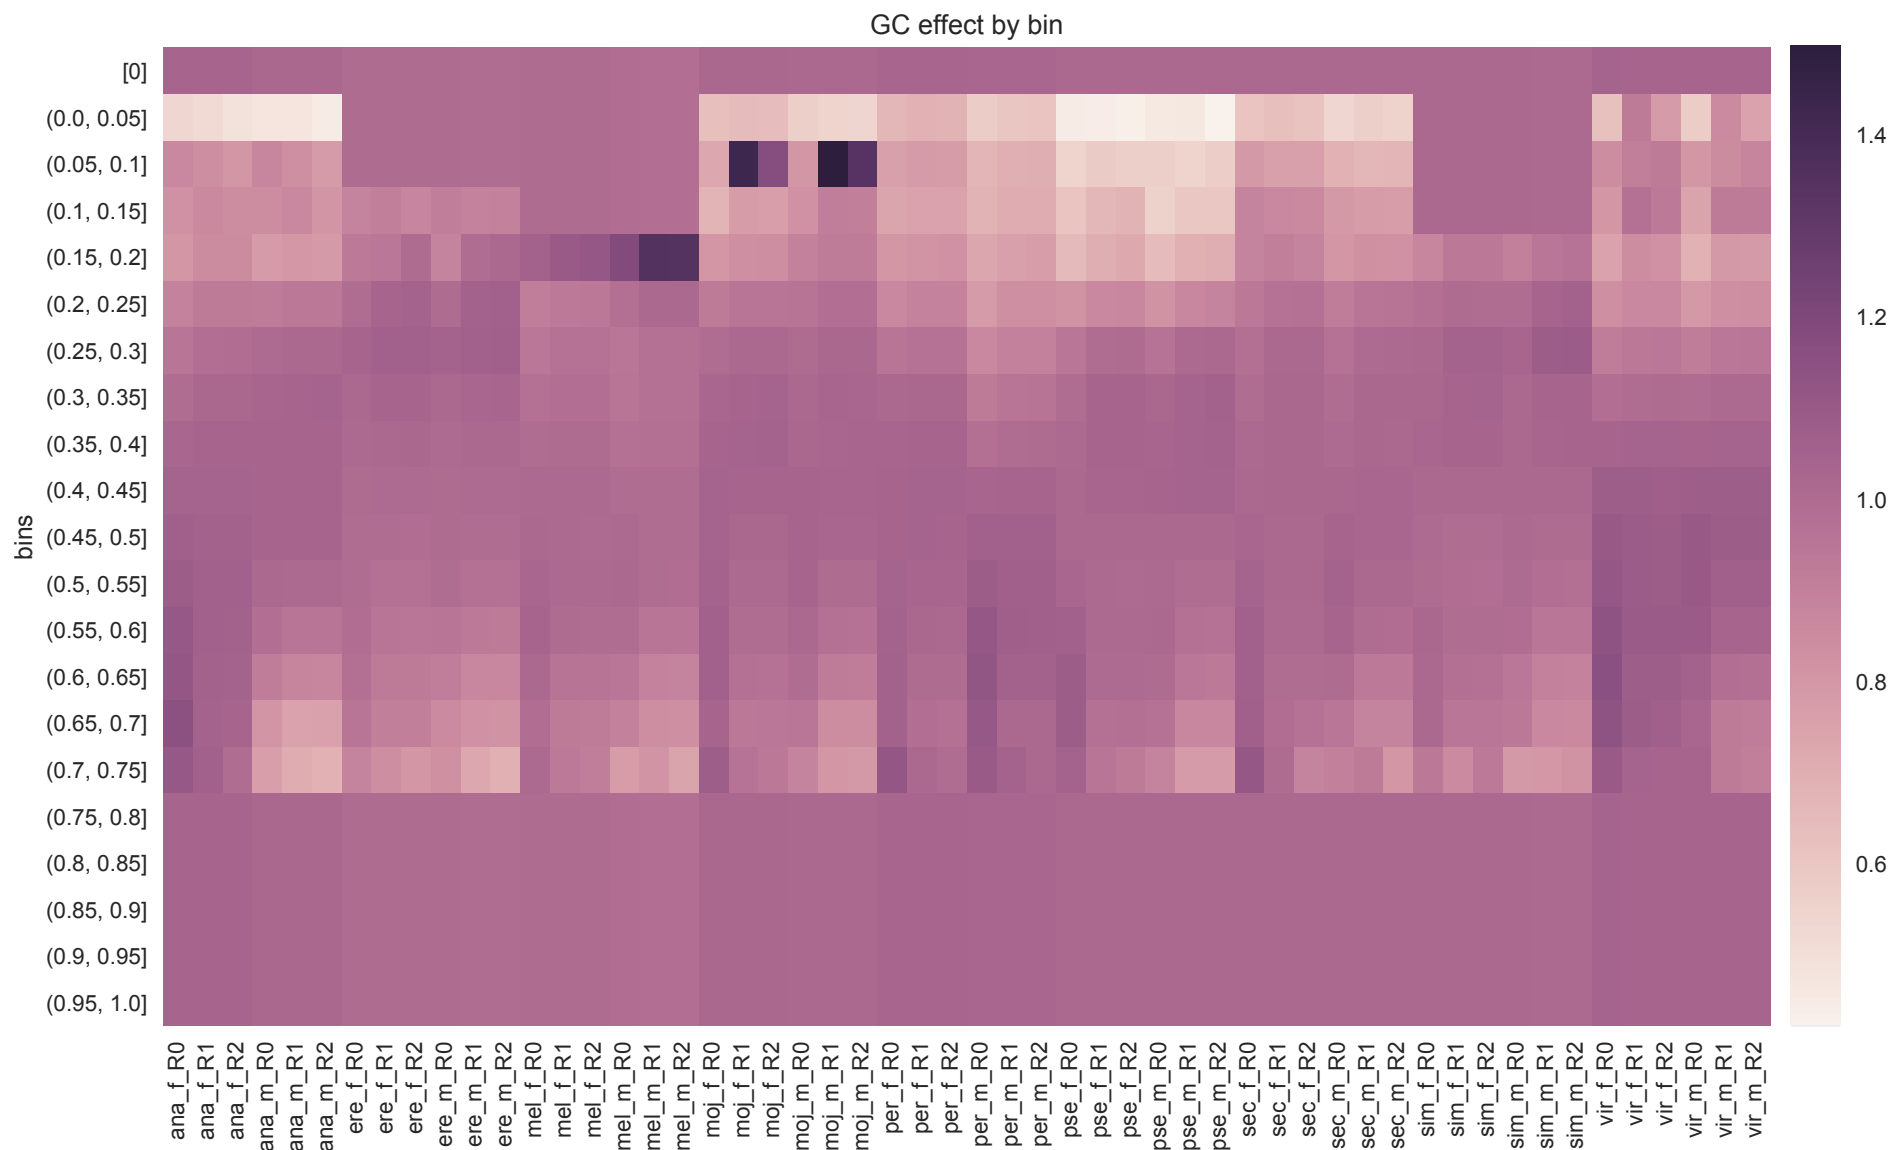

Supplementary Figure 2. Correction for GC bias across species samples and sequencings. The colors in the heatmap represent the over/under-representation of each GC bins (5% bins) of each sequenced sample (column). For each sample, there are three sequences: single end sequencing (R0), paired-end sequencing (R1 and R2).





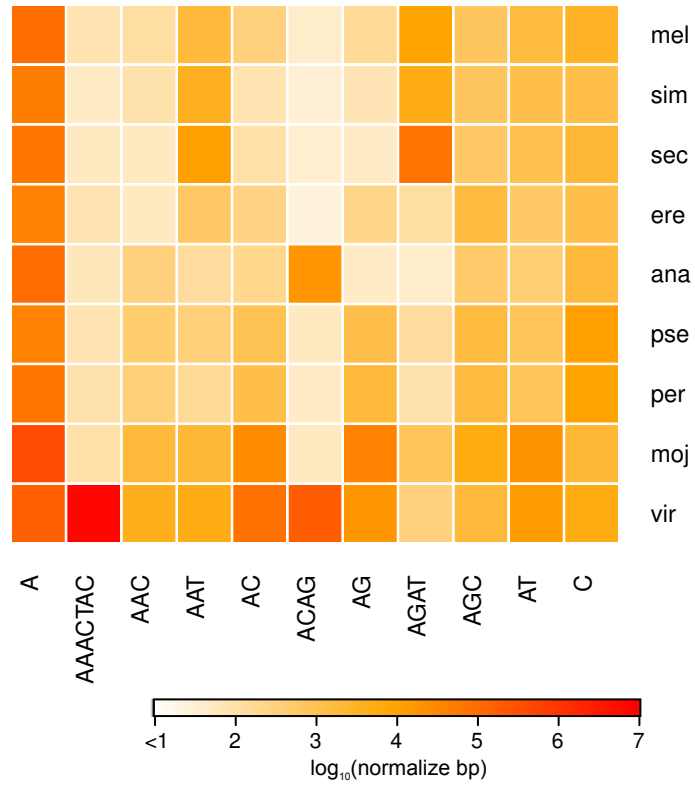

Supplementary Figure 4. Abundance of simple satellites present in all species.

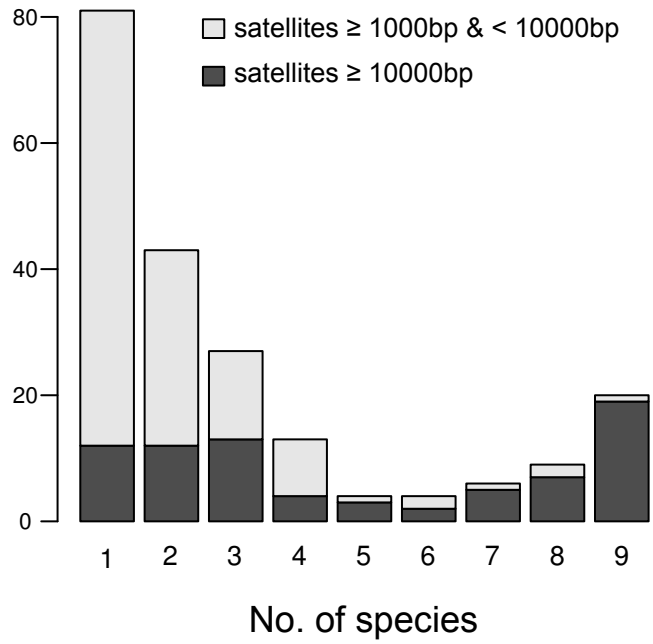

Supplementary Figure 5. Distribution of simple satellite presence among species with lower absence cutoff of <5x copy number.

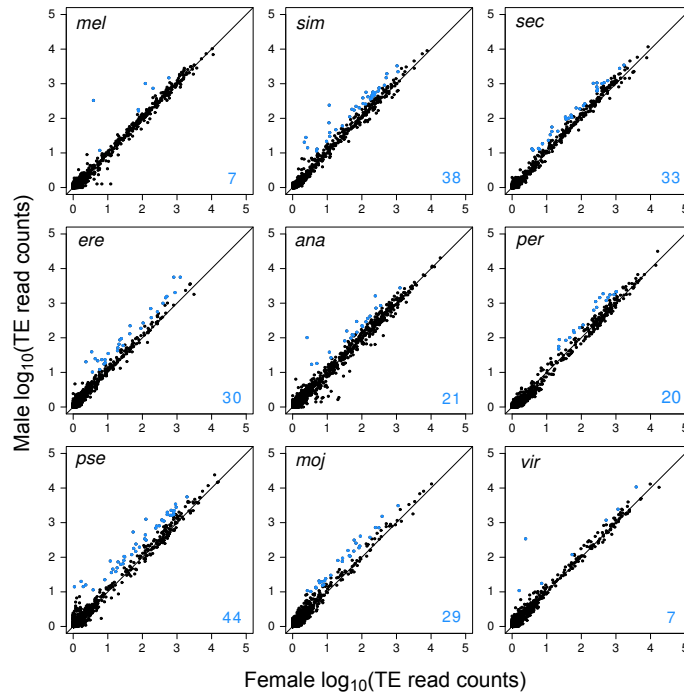

Supplementary Figure 6. Male-biased transposable elements. Y-linked TEs are those that are significantly more abundant in males than females by 1.5x (Fisher's Exact Test  $p < 0.005$ ). These TEs are plotted in blue dots and the number of them is labeled on the bottom right of each plot.

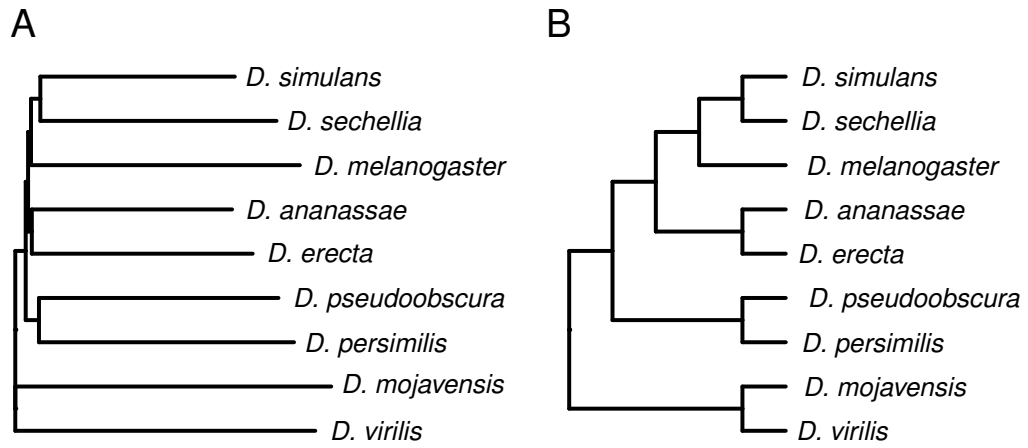

Supplementary Figure 7. Phylogeny inferred from kmer abundance. A. Neighbor-joining distance tree. B. Maximum parsimony tree.

A

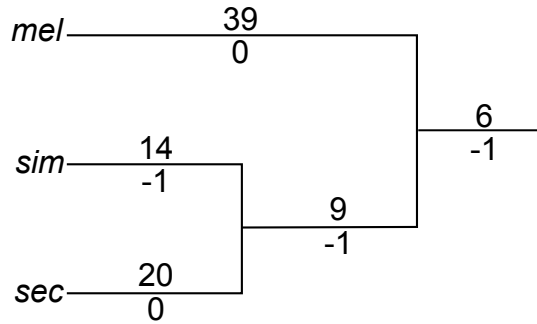

B

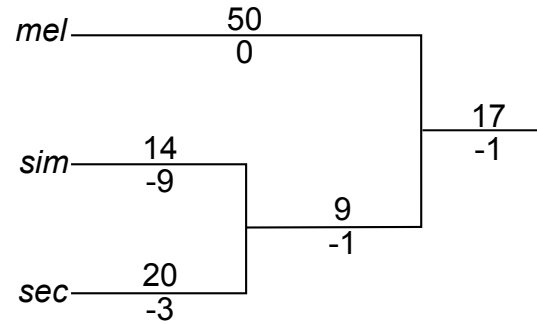

Supplementary Figure 8. Gain and losses within the melanogaster subgroup. 11 simple satellites are present in *D. melanogaster* but absent in either *D. simulans* or *D. sechellia*. Because they can either be parallel gains or gains in the branches leading up to the group followed by losses in either *D. simulans* or *D. sechellia*, they were classified as ambiguous and excluded from the tree in A (same as in the main text). In B, these satellites are counted as gains followed by losses.

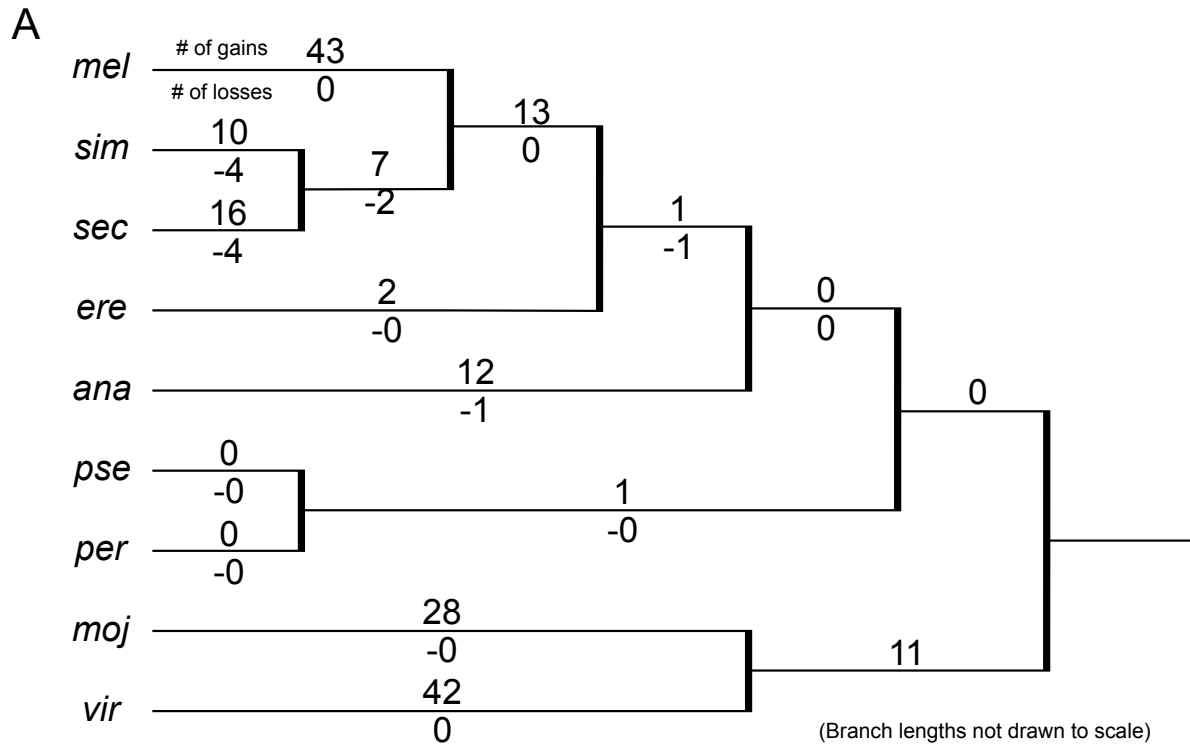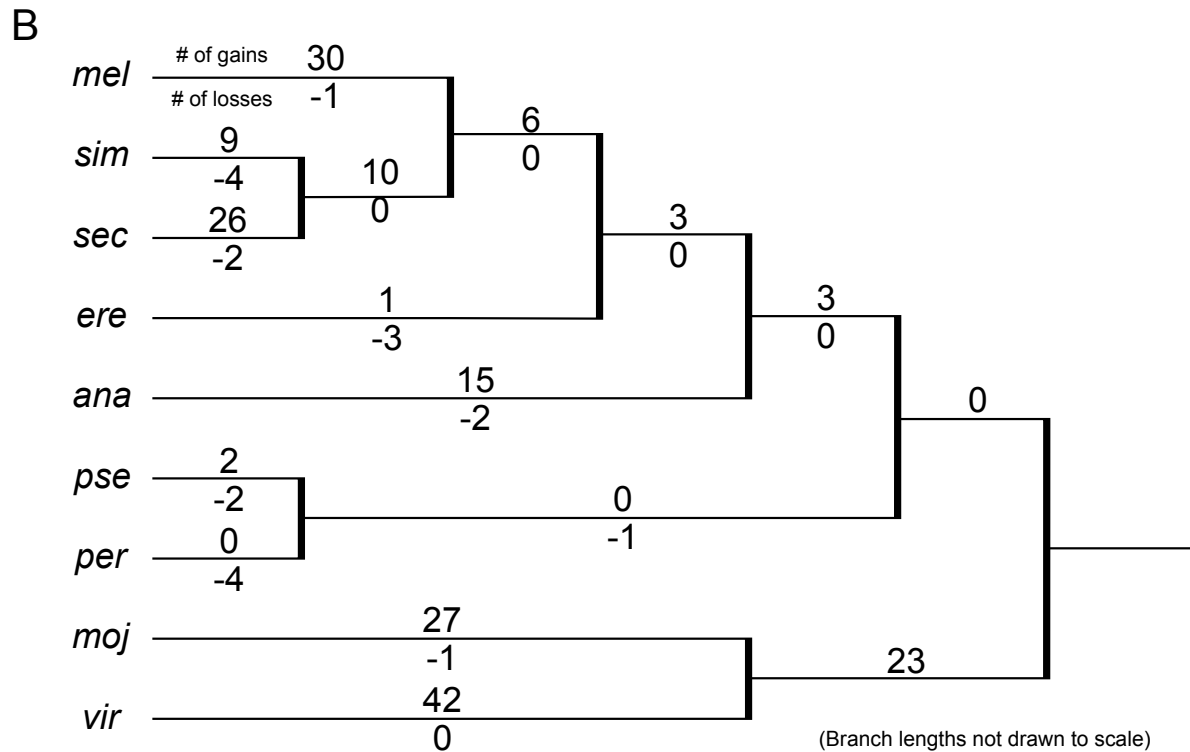

Supplementary Figure 9. Losses and gains inference with different presence cutoffs. A. Same analysis as with Figure 4A but satellites  $\geq 1000$  bp were deemed present. B. Same but, satellites with copy number  $\geq 5$  were deemed present. For both A and B, ambiguities were resolved in favor of losses instead of multiple gains.





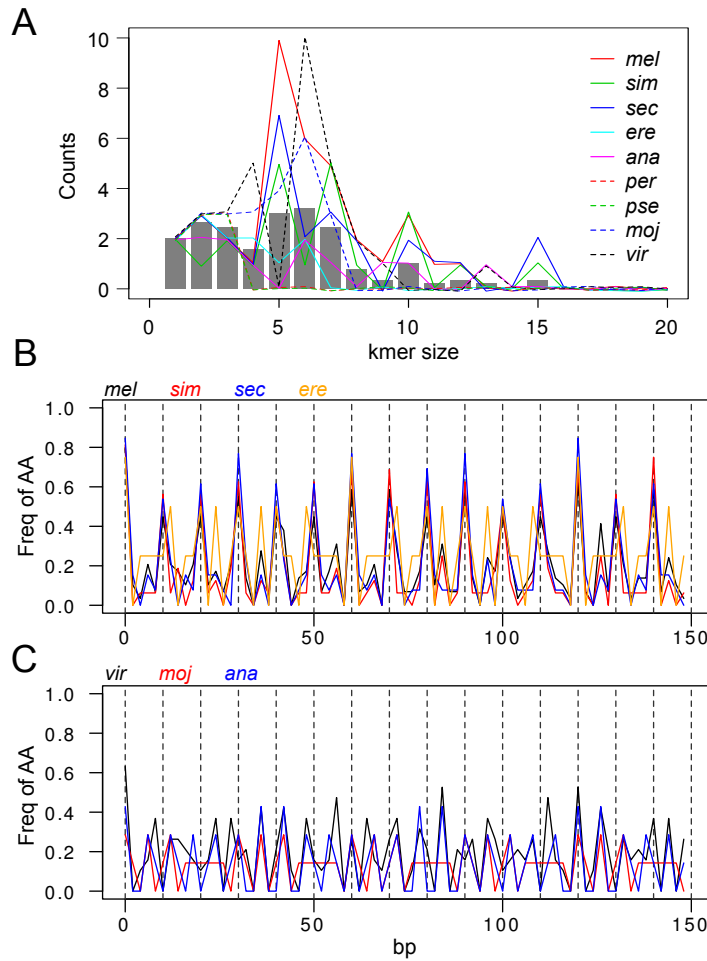

Supplementary Figure 11. Length and dinucleotide distribution of satellites. A. The distribution of kmer length is plotted for each species. Gray bars depict the average across the species. B. For each of the species of the melanogaster subgroup, the AA-dinucleotide frequency is plotted across 150bp which is roughly the length of DNA wrapping around a single nucleosome. Gray dotted lines mark every 10bp. Only kmer greater than 10kb are used to calculate the dinucleotide frequency as to capture satellites that have expanded. C. Same as B, but for *D. ananassae*, *D. virilis*, and *D. mojavensis*.
